# Supplementary material
Source: HighWire-hosted journal article supplement (doi:10.1136/ebmental-2013-101372)
Supplement: ebmental-2013-101372supp_references.pdf [file ebmental-2013-101372supp_references.pdf]

## References

1. Bergh S, Selbæk G, Engedal K. Discontinuation of antidepressants in people with dementia and neuropsychiatric symptoms (DESEP study): double blind, randomised, parallel group, placebo controlled trial. *BMJ* 2012;**344**:e1566.
2. Howard R, McShane R, Lindesay J, *et al.* Donepezil and memantine for moderate-to-severe Alzheimer's disease. *N Engl J Med* 2012;**366**:893-903.
